# Supplementary material for: Inhibition of TPL2 by interferon-α suppresses bladder cancer through activation of PDE4D
Source: Springer Nature journal article supplement (doi:10.1186/s13046-018-0971-4), 2018-11-27
Supplement: MOESM1 [file 16298260]

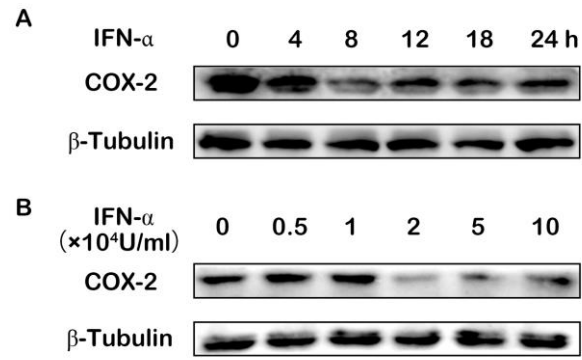

**Figure S1.** IFN- $\alpha$  down-regulates COX-2 expression in a time- and dose-dependent manner. **(A)** 5637 cells were treated with IFN- $\alpha$  ( $2 \times 10^4$  U/mL) and the COX-2 expression level was estimated at specific time points. **(B)** 5637 cells were treated with various concentrations of IFN- $\alpha$  for 24 h and the COX-2 expression level was estimated.
