# Supplementary material for: Inhibition of TPL2 by interferon-α suppresses bladder cancer through activation of PDE4D
Source: Springer Nature journal article supplement (doi:10.1186/s13046-018-0971-4), 2018-11-27
Supplement: MOESM2 [file 16298260]

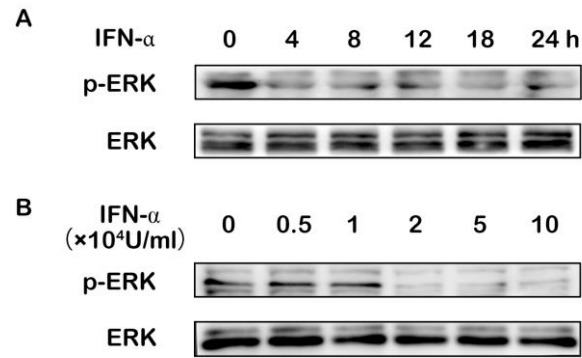

**Figure S2.** IFN- $\alpha$  inhibits the phosphorylation of ERK in bladder cancer cells. **(A)** 5637 cells were treated with IFN- $\alpha$  ( $2 \times 10^4$  U/mL) for specific time points. **(B)** 5637 cells were treated with various concentrations of IFN- $\alpha$  for 24 h. In both cases, p-ERK and ERK levels were analyzed by performing western blotting.
