# Supplementary material for: Inhibition of TPL2 by interferon-α suppresses bladder cancer through activation of PDE4D
Source: Springer Nature journal article supplement (doi:10.1186/s13046-018-0971-4), 2018-11-27
Supplement: MOESM3 [file 16298260]

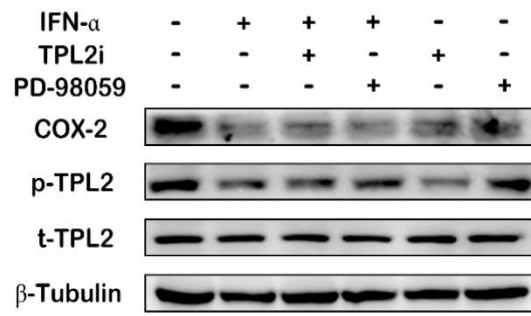

**Figure S3:** IFN- $\alpha$  down-regulates COX-2 expression by inhibition of TPL2. 5637 cells were treated with IFN- $\alpha$  ( $2 \times 10^4$  U/mL), TPL2i (2  $\mu$ M), and PD98059 (40  $\mu$ M) either individually or in combination for 24 h. COX-2, p-TPL2, and TPL2 expression levels were analyzed by performing western blotting.  $\beta$ -Tubulin was used as loading control.
