# Supplementary material for: Inhibition of TPL2 by interferon-α suppresses bladder cancer through activation of PDE4D
Source: Springer Nature journal article supplement (doi:10.1186/s13046-018-0971-4), 2018-11-27
Supplement: MOESM4 [file 16298260]

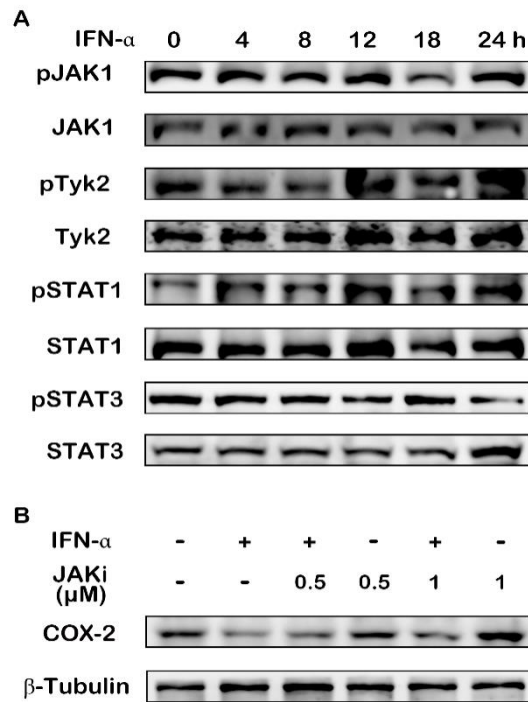

**Figure S4:** IFN- $\alpha$  inhibits COX-2 expression through non-canonical JAK-STAT signaling. **(A)** T24 cells were treated with IFN- $\alpha$  ( $1 \times 10^4$  U/mL) for 2 hours and the expression levels of pJAK1, JAK1, pTyk2, Tyk2, pSTAT1, STAT1, pSTAT3, and STAT3 were estimated at specific time points. **(B)** T24 cells were treated by IFN $\alpha$  ( $1 \times 10^4$  U/ml) and/or JAK kinase inhibitor for 24 hours. The expression of COX-2 was analyzed by western blotting. The  $\beta$ -Tubulin was detected as loading control.
