# Supplementary material for: Inhibition of TPL2 by interferon-α suppresses bladder cancer through activation of PDE4D
Source: Springer Nature journal article supplement (doi:10.1186/s13046-018-0971-4), 2018-11-27
Supplement: MOESM7 [file 16298260]

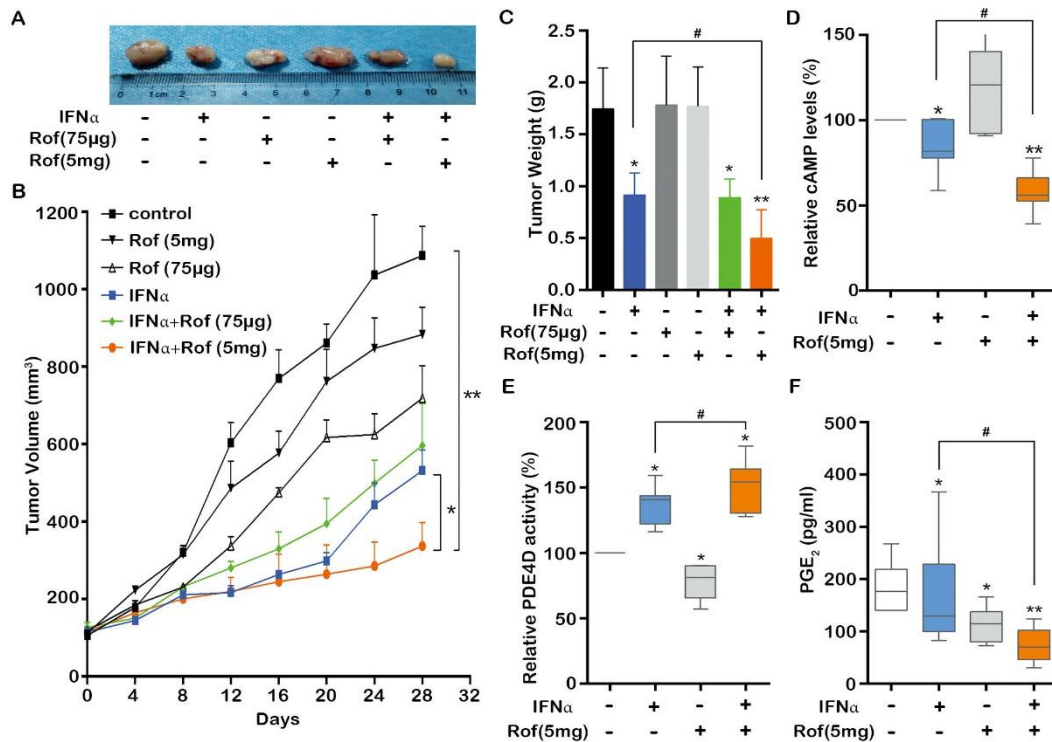

**Figure S7:** Roflumilast potentiated the anti-tumor effect of IFN- $\alpha$  *in vivo*. T24 cells ( $5 \times 10^6$  cells/mouse) were subcutaneously injected into BALB/c nude mice. When the tumor size was  $\sim 150$  mm<sup>3</sup>, mice were treated with phosphate buffered saline (control), roflumilast (75  $\mu$ g/kg/day or 5 mg/kg/day, oral administration), and IFN- $\alpha$  ( $1 \times 10^4$  U/mouse/2 days, intraperitoneal injection) either individually or in combination for 28 days before sacrifice. The tumor volumes were measured every 4 days. **(A)** Images of the representative tumors. **(B)** The tumor growth curves of all the treatment groups. Each data point indicates the mean of tumor volume ( $n = 7$  per group). **(C)** The tumor weights in all the treatment groups ( $n = 7$  per group). **(D)** cAMP levels in tumor tissues of indicated treatment groups. **(E)** The activity of immunoprecipitated PDE4D obtained from tumor tissues of indicated treatment groups. **(F)** PGE<sub>2</sub> concentrations in mice serums of indicated treatment groups. Error bars indicate mean  $\pm$  SD ( $n = 6$ ). \*,  $P < 0.05$ ; \*\*,  $P < 0.01$ ; #,  $P < 0.05$  (*t*-test and Mann-Whitney test).
