# Supplementary material for: Inhibition of TPL2 by interferon-α suppresses bladder cancer through activation of PDE4D
Source: Springer Nature journal article supplement (doi:10.1186/s13046-018-0971-4), 2018-11-27
Supplement: MOESM8 [file 16298260]

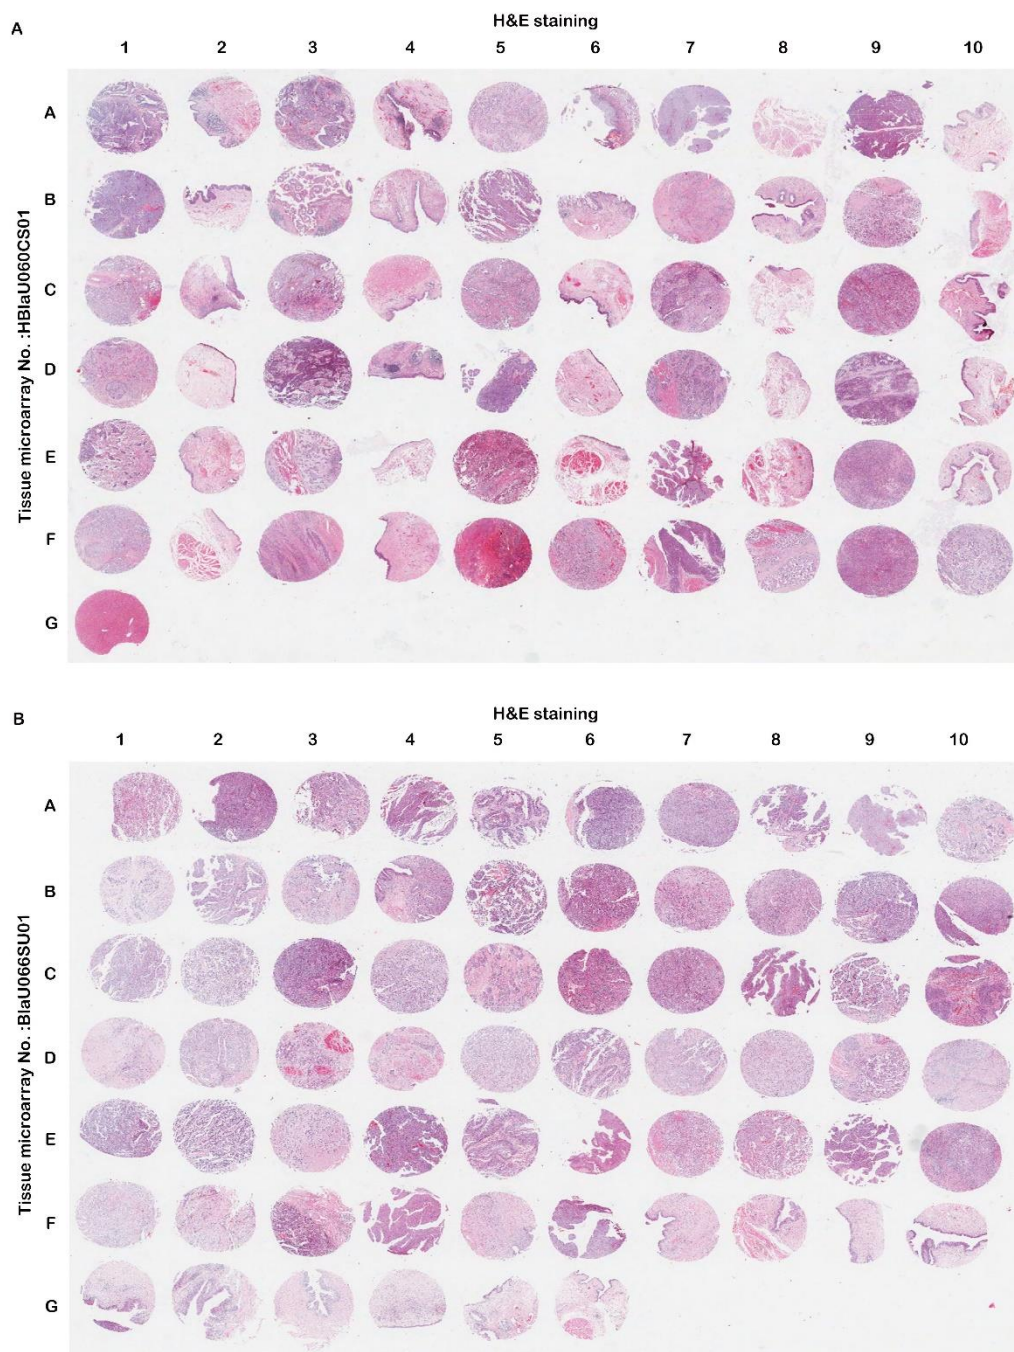

**Figure S8: (A-B)** Hematoxylin and eosin (H&E) staining images of two tissue microarray chips (No. HBlau060CS01 [A] and No. HBlau066Su01 [B]).
