# Supplementary material for: Inhibition of TPL2 by interferon-α suppresses bladder cancer through activation of PDE4D
Source: Springer Nature journal article supplement (doi:10.1186/s13046-018-0971-4), 2018-11-27
Supplement: MOESM10 [file 16298260]

**Supplementary Table 1** The differences analysis of the PDE4D and the p-TPL2 expressions between in bladder cancer tissues and in adjacent normal tissues

| Expression |                            | Mean $\pm$ Std. Deviation | P value      | Z value |
|------------|----------------------------|---------------------------|--------------|---------|
| PDE4D      | Cytoplasm (tumor)          | 1.663 $\pm$ 0.643         | <b>0.009</b> | -2.613  |
|            | Cytoplasm (tumor-adjacent) | 2.118 $\pm$ 0.616         |              |         |
| p-TPL2     | Cytoplasm (tumor)          | 6.606 $\pm$ 1.903         | <b>0.003</b> | -2.985  |
|            | Cytoplasm (tumor-adjacent) | 4.542 $\pm$ 2.245         |              |         |
|            | Nuclear (tumor)            | 1.576 $\pm$ 1.480         | 0.261        | -1.125  |
|            | Nuclear (tumor-adjacent)   | 1.875 $\pm$ 1.296         |              |         |

The non-parametric Wilcoxon signed-rank test was used for comparison.

Values of  $P < 0.05$  were considered statistically significant.

**Supplementary Table 2** Statistical analysis of the correlations among PDE4D expression, p-TPL2 expression and clinicopathological parameters

|                   |                         | Characteristic |              |            |              |                    |
|-------------------|-------------------------|----------------|--------------|------------|--------------|--------------------|
|                   |                         | Both sexes     | Age (45~75)  | Tumor size | TNM stage    | Distant metastasis |
| PDE4D expression  | Correlation Coefficient | -.090          | <b>-.356</b> | .135       | <b>-.241</b> | .195               |
|                   | Sig.(2-tailed)          | .401           | <b>.001</b>  | .215       | <b>.037</b>  | .096               |
| p-TPL2 expression | Correlation Coefficient | -.060          | -.075        | -.213      | <b>.538</b>  | -.252              |
|                   | Sig.(2-tailed)          | .781           | .729         | .330       | <b>.021</b>  | .235               |

Abbreviations: TNM indicates tumor node metastasis.

Correlation coefficient: ranges from -1 to +1; -1 indicates the strongest possible disagreement and +1 the strongest possible agreement.

Sig. (2-tailed):  $<0.01$  or  $<0.05$  are statistically significant.

Correlation coefficient and Sig. (2-tailed) were obtained from spearman correlation.
