# Supplementary material for: Inhibition of TPL2 by interferon-α suppresses bladder cancer through activation of PDE4D
Source: Springer Nature journal article supplement (doi:10.1186/s13046-018-0971-4), 2018-11-27
Supplement: MOESM12 [file 16298260]

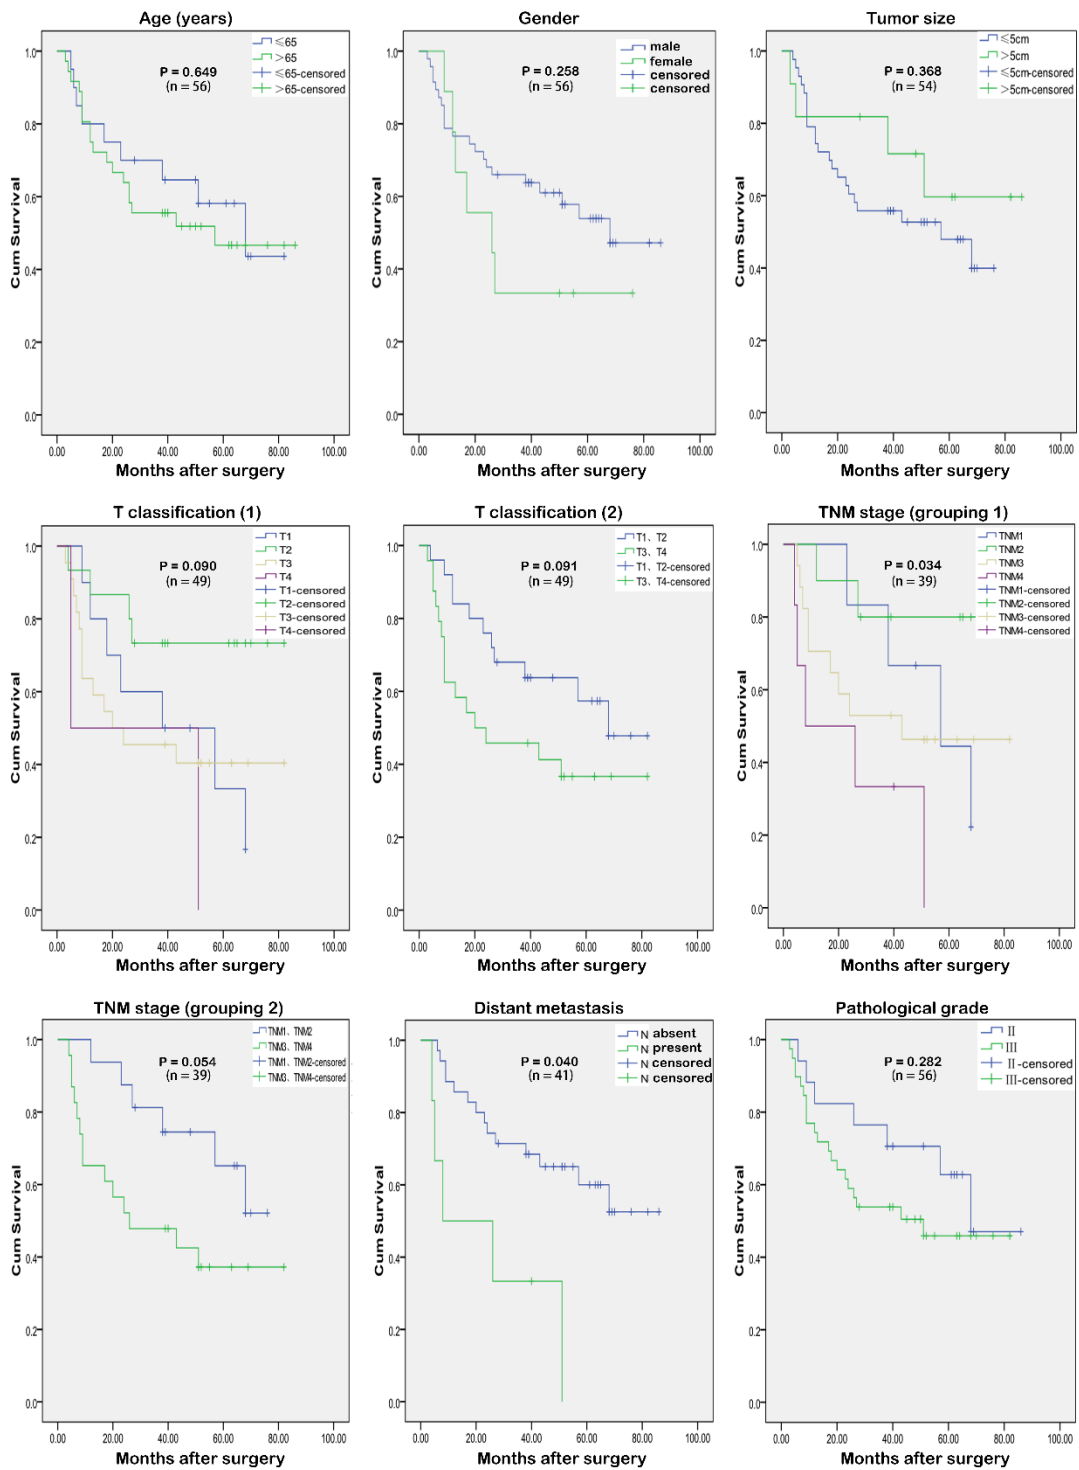

**Figure S11:** The survival curves of patients that correspond to each of the clinicopathologic features. All data were obtained from the tissue microarray chips that were used in this study. The survival curves were calculated by the Kaplan-Meier method and analyzed by the log-rank test.
