# Supplementary material for: Inhibition of TPL2 by interferon-α suppresses bladder cancer through activation of PDE4D
Source: Springer Nature journal article supplement (doi:10.1186/s13046-018-0971-4), 2018-11-27
Supplement: MOESM14 [file 16298260]

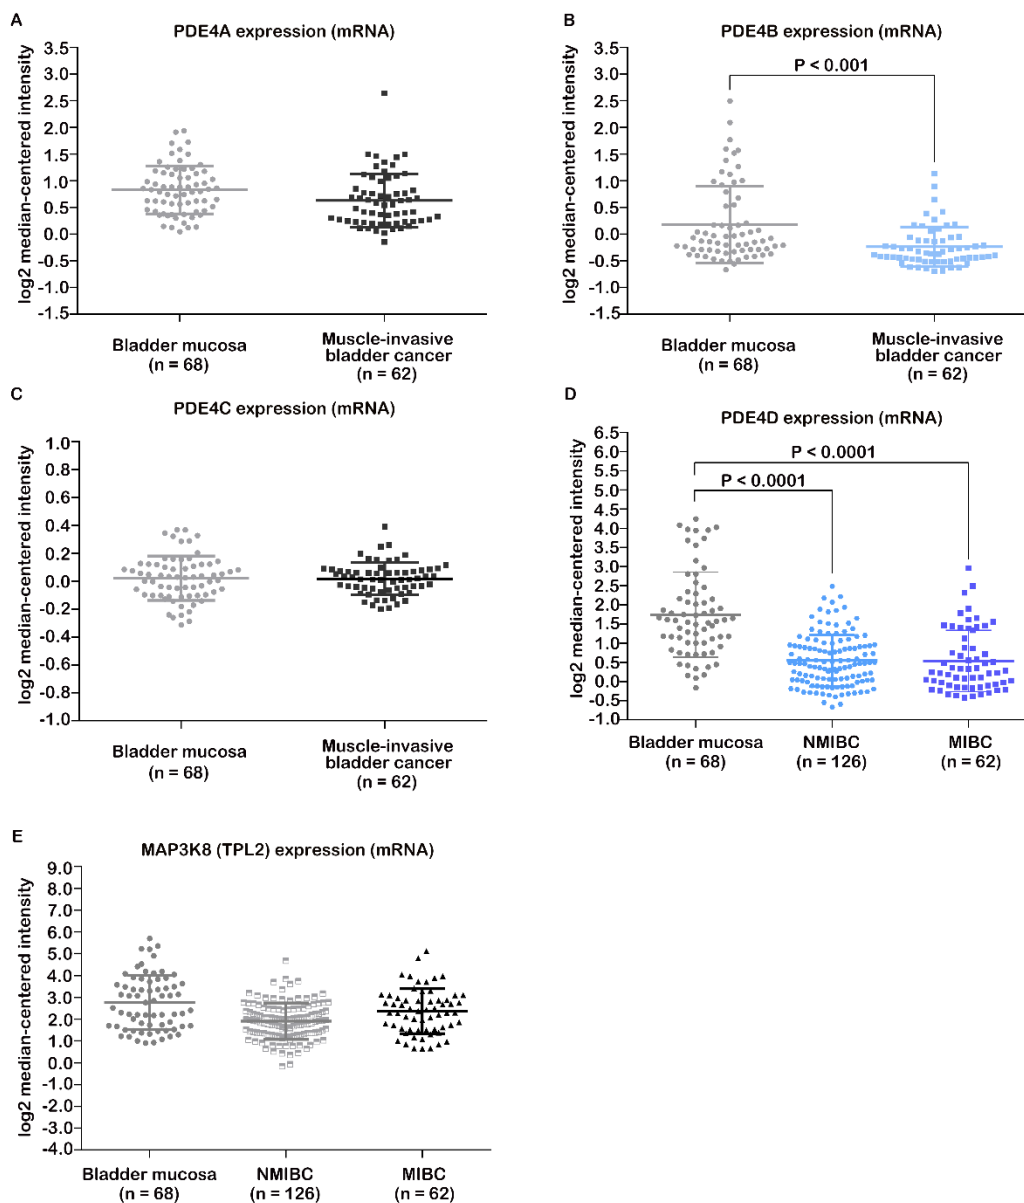

**Figure S13:** The relationships of bladder cancer with the expression of PDE4 family members and TPL2. **(A-D)** The mRNA levels of PDE4D showed the most significant down-regulation in muscle-invasive bladder cancer (MIBC) when compared with the other three PDE4 family members (PDE4A, 4B and 4C). **(E)** No significant differences of total TPL2 mRNA levels were found among bladder mucosa, NMIBC and MIBC. All data were obtained from the Oncomine database (Lee Bladder Dataset; J Clin Oncol 2010/06/01) and analyzed by unpaired Wilcoxon test. Values of  $P < 0.01$  were considered statistically significant.
